# Supplementary material for: Altering the Microbiome Inhibits Tumorigenesis in a Mouse Model of Oviductal High-Grade Serous Carcinoma
Source: Oxford University Press journal article supplement (doi:10.1158/0008-5472.can-21-0106), 2021-04-16
Supplement: 00085472can210106-sup-258786_2_supp_7046187_qr3y92.docx [file 00085472can210106-sup-258786_2_supp_7046187_qr3y92.docx]

**Table S1. PCR primer sequences**

| **Name** | **Sequence (5`-3`)** |
| --- | --- |
| 16s_Fwd | CCTACGGGAGGCAGCAG |
| 16s_Rev | ATTACCGCGGCTGCTGG |
| ACTB_Fwd | CTCTCAGCTGTGGTGGTGAA |
| ACTB_Rev | AGCCATGTACGTAGCCATCC |
| Clostridium XIVa OTU11_Fwd | AGCGTAGACGGCGAAGCA |
| Clostridium XIVa OTU11_Rev | CCTCTCCGACACTCTAGCAAA |
| Bacteroides_Fwd | GAGCGTAGGTGGATTGTT |
| Bacteroides_Rev | CACGAATTCCGCCCAC |
| Acetatifactor_Fwd  Acetatifactor_Rev | GGAGCGTAGACGGTTATGT  CCTCCTGTACTCCAGTTACA |
| Mucispirillum_Fwd  Mucispirillum_Rev | GGCTGGGTGTTAATGGCAGA  CTGCCTGTCGCCTTTGTTTG |
| Clostridium XIVa OTU185_Fwd | AGCGTAGACGGCGACGCA |
| Clostridium XIVa OTU185_Rev | CTCCTGCACTCCAGCAAC |
